# Supplementary material
Source: publisher figshare collection journal article supplement (https://tandf.figshare.com/ndownloader/files/14037089)

Figure A1. Annual average bean yields [tons per hectare] and quantities of beans produced, domestically consumed and traded [1,000 tons], 2000 – 2011 Source: (FAO, 2016a).

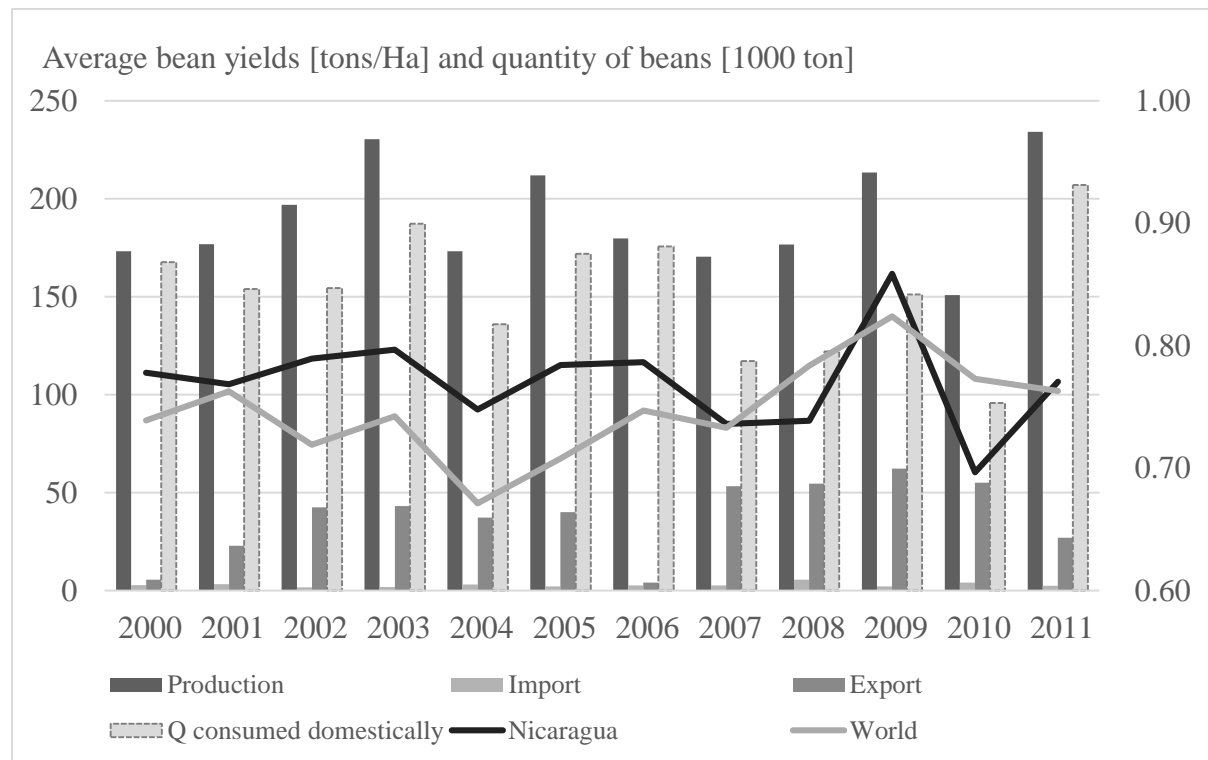

Figure A2. Number of producers in each intervention, 2007–2012.

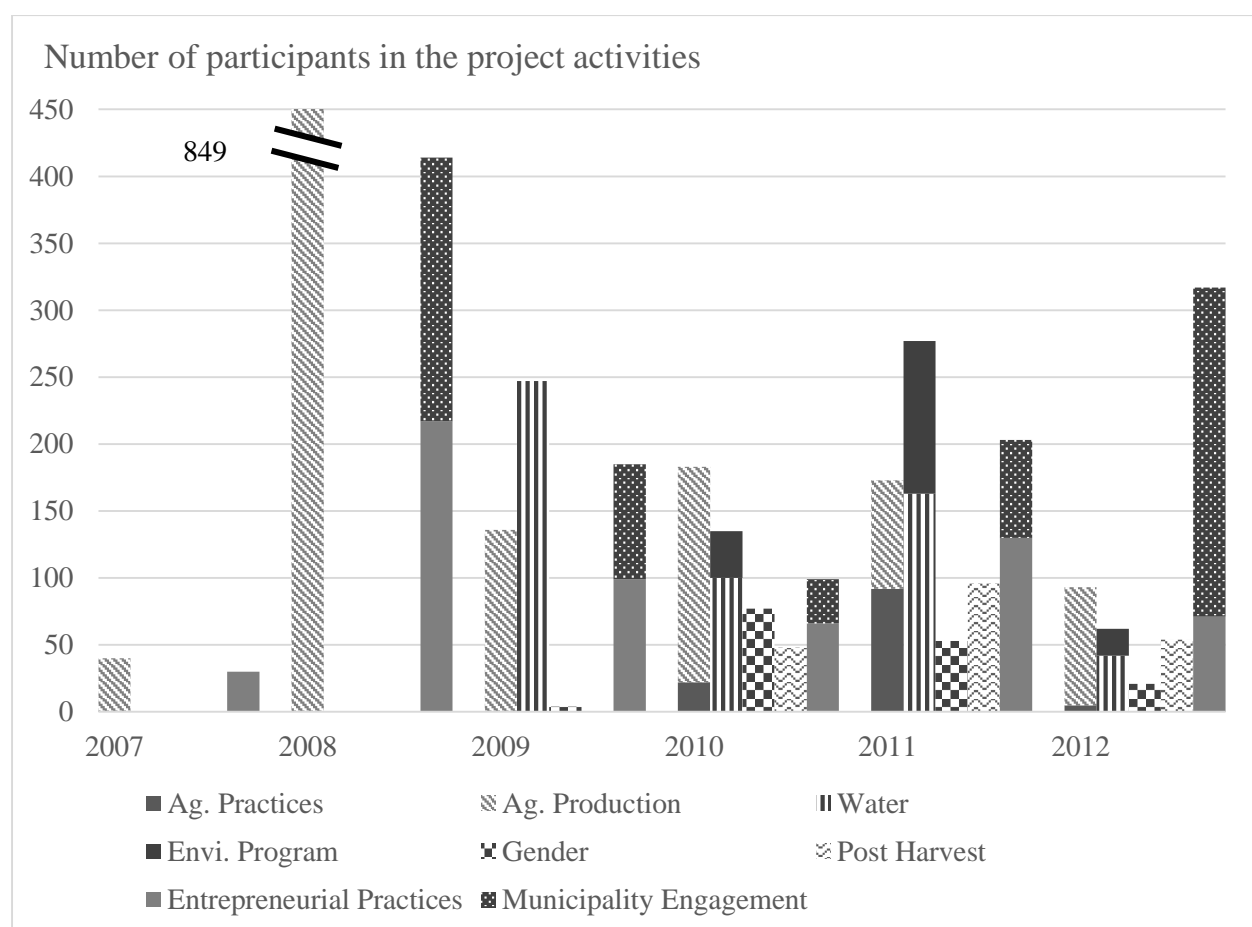

Source: CRS database.

Figure A3. Empirical strategy to assess the effect of the market linkage programme.

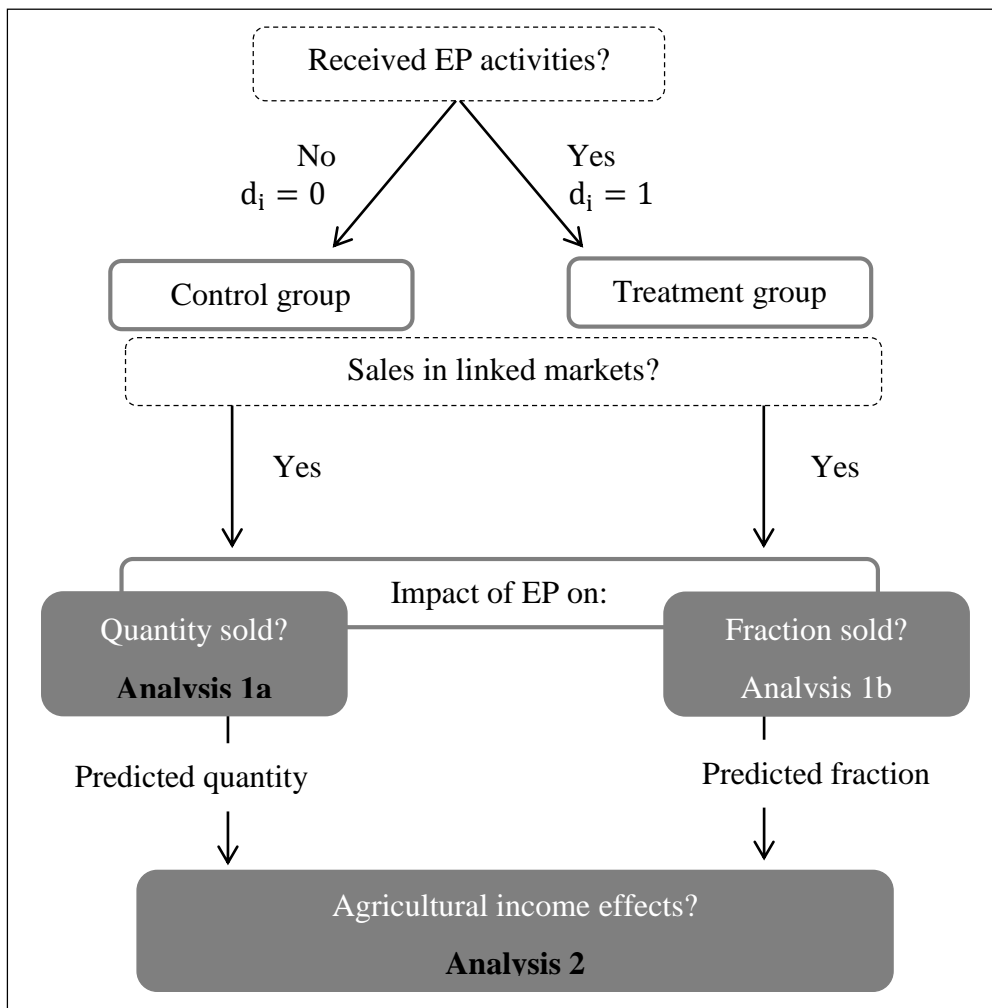

Supplement: Supplementary file 1 [file 14037089]
